# Supplementary material for: OTUs and ASVs Produce Comparable Taxonomic and Diversity from Shrimp Microbiota 16S Profiles Using Tailored Abundance Filters
Source: MDPI journal article supplement (doi:10.3390/genes12040564), 2021-04-13
Supplement: s1 [file s1]

**Table S3.1.** Preprocessing and clustering totals per sample and set.

| <i>Sample</i> | <i>Raw</i> | <i>Cutadapt<br/>Filters</i> | <i>Prinseq<br/>Filters</i> | <i>Cope<br/>Join</i> | <i>01_OTU_97</i> | <i>02_OTU_99</i> | <i>03_ASV</i> | <i>Ponds</i> |
|---------------|------------|-----------------------------|----------------------------|----------------------|------------------|------------------|---------------|--------------|
| <i>V3_HE1</i> | 61875      | 52509                       | 51661                      | 45716                | 45277            | 42294            | 48855         | <u>L=R2</u>  |
| <i>V3_HE2</i> | 47716      | 39328                       | 38527                      | 31154                | 30844            | 28977            | 36448         | <u>E=F3</u>  |
| <i>V3_HE3</i> | 46917      | 38897                       | 38152                      | 33779                | 32915            | 29955            | 34500         |              |
| <i>V3_HE4</i> | 59493      | 51563                       | 50593                      | 42631                | 41792            | 38038            | 46864         |              |
| <i>V3_HE5</i> | 35357      | 29369                       | 28873                      | 24390                | 23924            | 21689            | 26860         |              |
| <i>V3_HE6</i> | 41102      | 37100                       | 36416                      | 29604                | 29327            | 27668            | 35084         |              |
| <i>V3_HL1</i> | 43970      | 39962                       | 39186                      | 33787                | 32985            | 29629            | 36829         |              |
| <i>V3_HL2</i> | 41333      | 35652                       | 35090                      | 30786                | 30189            | 26874            | 31984         |              |
| <i>V3_HL3</i> | 50202      | 42142                       | 41354                      | 36973                | 36388            | 32566            | 37596         |              |
| <i>V3_HL4</i> | 51624      | 43888                       | 42926                      | 38509                | 37949            | 34495            | 40172         |              |
| <i>V3_HL5</i> | 57080      | 50540                       | 49681                      | 45251                | 44924            | 41511            | 47592         |              |
| <i>V3_HL6</i> | 63120      | 55570                       | 54615                      | 48962                | 47885            | 42645            | 49398         |              |
| <i>V3_IE1</i> | 47264      | 42645                       | 41900                      | 38350                | 37579            | 35161            | 38757         |              |
| <i>V3_IE2</i> | 52704      | 50064                       | 49302                      | 46845                | 45973            | 42397            | 44518         |              |
| <i>V3_IE3</i> | 43865      | 41989                       | 41242                      | 38142                | 37704            | 36059            | 39028         |              |
| <i>V3_IE4</i> | 49797      | 39396                       | 38666                      | 35619                | 34988            | 32598            | 36084         |              |
| <i>V3_IE5</i> | 45956      | 44159                       | 43395                      | 40140                | 39150            | 36557            | 39564         |              |
| <i>V3_IE6</i> | 42767      | 40319                       | 39517                      | 35696                | 34700            | 32363            | 36178         |              |
| <i>V3_IL1</i> | 39943      | 28142                       | 27663                      | 24322                | 24236            | 23047            | 27205         |              |
| <i>V3_IL2</i> | 32353      | 24963                       | 24321                      | 20462                | 20337            | 19253            | 23447         |              |
| <i>V3_IL3</i> | 34013      | 26609                       | 26068                      | 22176                | 22046            | 20703            | 25314         |              |
| <i>V3_IL4</i> | 46732      | 43564                       | 42881                      | 41214                | 40966            | 39203            | 41638         |              |
| <i>V3_IL5</i> | 29675      | 24119                       | 23710                      | 19815                | 19726            | 18765            | 23143         |              |
| <i>V3_IL6</i> | 37712      | 34926                       | 34336                      | 29177                | 29044            | 27766            | 33207         |              |
| <i>Mean</i>   | 45940.4    | 39892.3                     | 39169.8                    | 34729.2              | 34202            | 31675.5          | 36677.7       |              |
| <i>SD</i>     | 8766.43    | 8592.2                      | 8464.32                    | 8282.39              | 8088.06          | 7335.93          | 7543.79       |              |
| <i>Total</i>  | 1102570    | 957415                      | 940075                     | 833500               | 820848           | 760213           | 880265        |              |

**Table S3.2.** Total reads and unique features per set.

| <i>Class</i> | <i>Order</i> | <i>Family</i> | <i>Genus</i> | <i>Species</i> | <i>OTUs/ASVs</i> | <i>Total<br/>Reads</i> |
|--------------|--------------|---------------|--------------|----------------|------------------|------------------------|
| 96           | 177          | 329           | 626          | 734            | 4968             | 783114                 |
| 93           | 176          | 328           | 616          | 739            | 11541            | 728793                 |
| 81           | 146          | 248           | 392          | 446            | 1407             | 854845                 |
| 99           | 185          | 346           | 705          | 874            |                  |                        |
| <i>Class</i> | <i>Order</i> | <i>Family</i> | <i>Genus</i> | <i>Species</i> | <i>OTUs/ASVs</i> | <i>Total<br/>Reads</i> |
| 37           | 79           | 134           | 206          | 236            | 533              | 742714                 |
| 37           | 78           | 138           | 213          | 259            | 603              | 638996                 |
| 39           | 79           | 135           | 211          | 252            | 774              | 844525                 |
| 39           | 83           | 146           | 255          | 315            |                  |                        |

**Table S3.3.** Reads in clusters and taxa unique to each set.

|          | Level    | Total Reads | Reads in all taxa | Reads only 01_OTU_97 | Reads only 02_OTU_99 | Reads only 03_ASV | Reads only OTUs | Reads only ASVs |
|----------|----------|-------------|-------------------|----------------------|----------------------|-------------------|-----------------|-----------------|
| Raw      | Phylum   | 2366685     | 2366608           | 2                    | 0                    | 56                | 2               | 56              |
|          | Class    | 2366568     | 2366258           | 60                   | 0                    | 56                | 60              | 56              |
|          | Order    | 2366344     | 2364883           | 65                   | 35                   | 56                | 100             | 56              |
|          | Family   | 2365991     | 2360320           | 112                  | 46                   | 56                | 158             | 56              |
|          | Genus    | 2365342     | 2323221           | 5092                 | 406                  | 56                | 5498            | 56              |
|          | Species  | 2365070     | 2297552           | 10851                | 877                  | 56                | 11728           | 56              |
|          | Raw      | Total Taxa  | Taxa all sets     | Taxa only 01_OTU_97  | Taxa_only_02_OTU_99  | Taxa only 03_ASV  | Taxa Only OTUs  | Taxa only ASVs  |
|          | Phylum   | 36          | 30                | 1                    | 0                    | 1                 | 1               | 1               |
|          | Class    | 99          | 78                | 5                    | 0                    | 1                 | 5               | 1               |
|          | Order    | 185         | 142               | 7                    | 5                    | 1                 | 12              | 1               |
|          | Family   | 346         | 240               | 16                   | 10                   | 1                 | 26              | 1               |
|          | Genus    | 705         | 359               | 87                   | 47                   | 1                 | 134             | 1               |
|          | Species  | 874         | 393               | 133                  | 88                   | 1                 | 221             | 1               |
|          | Level    | Total Reads | Reads in all taxa | Reads only 01_OTU_97 | Reads only 02_OTU_99 | Reads only 03_ASV | Reads only OTUs | Reads only ASVs |
| Filtered | Phylum   | 2366355     | 2366144           | 0                    | 0                    | 211               | 0               | 211             |
|          | Class    | 2364270     | 2364059           | 0                    | 0                    | 211               | 0               | 211             |
|          | Order    | 2361938     | 2360664           | 299                  | 52                   | 211               | 351             | 211             |
|          | Family   | 2358518     | 2353069           | 901                  | 271                  | 211               | 1172            | 211             |
|          | Genus    | 2350804     | 2289694           | 10361                | 624                  | 763               | 10985           | 763             |
|          | Species  | 2348976     | 2230270           | 14300                | 1134                 | 871               | 15434           | 871             |
|          | Filtered | Total Taxa  | Taxa all sets     | Taxa only 01_OTU_97  | Taxa_only_02_OTU_99  | Taxa only 03_ASV  | Taxa Only OTUs  | Taxa only ASVs  |
|          | Phylum   | 21          | 19                | 0                    | 0                    | 2                 | 0               | 2               |
|          | Class    | 39          | 37                | 0                    | 0                    | 2                 | 0               | 2               |
|          | Order    | 83          | 75                | 2                    | 1                    | 2                 | 3               | 2               |
|          | Family   | 146         | 126               | 5                    | 4                    | 2                 | 9               | 2               |
|          | Genus    | 255         | 168               | 30                   | 9                    | 9                 | 39              | 9               |
|          | Species  | 315         | 184               | 42                   | 14                   | 11                | 56              | 11              |

**Table S3.4.** ANOSIM results for group comparisons with multiple metrics.

| Metric             | Set       | Lvl     | Org R | Pond R | Org-Pond R | HF3 vs IF3 R | HF3 vs HR2 R | HF3 vs IR2 R | IF3 vs HR2 R | IF3 vs IR2 R | HR2 vs IR2 R | Org pval | Pond pval | Org-Pond pval | HF3 vs IF3 pval | HF3 vs HR2 pval | HF3 vs IR2 pval | IF3 vs HR2 pval | IF3 vs IR2 pval | HR2 vs IR2 pval |
|--------------------|-----------|---------|-------|--------|------------|--------------|--------------|--------------|--------------|--------------|--------------|----------|-----------|---------------|-----------------|-----------------|-----------------|-----------------|-----------------|-----------------|
| Unweighted Unifrac | 01_OTU_97 | OTU/ASV | 0.297 | 0.336  | 0.802      | 0.933        | 0.782        | 0.687        | 0.817        | 0.893        | 0.767        | 0.006    | 0.001     | 0.001         | 0.004           | 0.004           | 0.005           | 0.003           | 0.007           | 0.005           |
| Unweighted Unifrac | 02_OTU_99 | OTU/ASV | 0.273 | 0.352  | 0.805      | 0.904        | 0.715        | 0.698        | 0.833        | 0.92         | 0.746        | 0.01     | 0.001     | 0.001         | 0.002           | 0.005           | 0.002           | 0.002           | 0.001           | 0.004           |
| Unweighted Unifrac | 03_ASV    | OTU/ASV | 0.226 | 0.294  | 0.692      | 0.867        | 0.452        | 0.585        | 0.693        | 0.887        | 0.604        | 0.013    | 0.002     | 0.001         | 0.002           | 0.01            | 0.006           | 0.003           | 0.003           | 0.005           |
| Weighted Unifrac   | 01_OTU_97 | OTU/ASV | 0.168 | 0.165  | 0.607      | 0.896        | 0.617        | 0.317        | 0.606        | 0.824        | 0.448        | 0.022    | 0.031     | 0.001         | 0.002           | 0.002           | 0.012           | 0.003           | 0.003           | 0.016           |
| Weighted Unifrac   | 02_OTU_99 | OTU/ASV | 0.166 | 0.153  | 0.592      | 0.88         | 0.583        | 0.296        | 0.582        | 0.802        | 0.456        | 0.028    | 0.034     | 0.001         | 0.003           | 0.01            | 0.01            | 0.003           | 0.004           | 0.016           |
| Weighted Unifrac   | 03_ASV    | OTU/ASV | 0.159 | 0.159  | 0.596      | 0.898        | 0.624        | 0.259        | 0.615        | 0.806        | 0.441        | 0.022    | 0.028     | 0.001         | 0.001           | 0.003           | 0.017           | 0.003           | 0.003           | 0.019           |
| Jaccard            | 01_OTU_97 | Phylum  | 0.109 | 0.425  | 0.536      | 0.808        | 0.352        | 0.613        | 0.544        | 0.807        | 0.302        | 0.047    | 0.001     | 0.001         | 0.003           | 0.003           | 0.008           | 0.004           | 0.002           | 0.02            |
| Jaccard            | 01_OTU_97 | Class   | 0.101 | 0.401  | 0.51       | 0.826        | 0.228        | 0.744        | 0.441        | 0.875        | 0.465        | 0.0569   | 0.001     | 0.001         | 0.002           | 0.005           | 0.006           | 0.003           | 0.007           | 0.017           |
| Jaccard            | 01_OTU_97 | Order   | 0.176 | 0.338  | 0.515      | 0.902        | 0.36         | 0.543        | 0.575        | 0.733        | 0.411        | 0.01     | 0.001     | 0.001         | 0.003           | 0.003           | 0.003           | 0.006           | 0.004           | 0.025           |
| Jaccard            | 01_OTU_97 | Family  | 0.23  | 0.399  | 0.659      | 0.848        | 0.594        | 0.641        | 0.741        | 0.776        | 0.618        | 0.004    | 0.001     | 0.001         | 0.002           | 0.004           | 0.006           | 0.004           | 0.003           | 0.008           |
| Jaccard            | 01_OTU_97 | Genus   | 0.237 | 0.39   | 0.697      | 0.823        | 0.727        | 0.656        | 0.759        | 0.744        | 0.655        | 0.007    | 0.001     | 0.001         | 0.004           | 0.001           | 0.004           | 0.007           | 0.002           | 0.012           |
| Jaccard            | 01_OTU_97 | Species | 0.258 | 0.383  | 0.722      | 0.856        | 0.761        | 0.682        | 0.777        | 0.785        | 0.677        | 0.003    | 0.001     | 0.001         | 0.003           | 0.006           | 0.002           | 0.003           | 0.004           | 0.004           |
| Jaccard            | 01_OTU_97 | OTU/ASV | 0.296 | 0.298  | 0.803      | 0.95         | 0.861        | 0.644        | 0.857        | 0.885        | 0.744        | 0.002    | 0.005     | 0.001         | 0.002           | 0.002           | 0.002           | 0.001           | 0.004           | 0.003           |
| Jaccard            | 02_OTU_99 | Phylum  | 0.093 | 0.418  | 0.514      | 0.75         | 0.369        | 0.606        | 0.52         | 0.765        | 0.302        | 0.0629   | 0.001     | 0.001         | 0.004           | 0.003           | 0.007           | 0.001           | 0.005           | 0.023           |
| Jaccard            | 02_OTU_99 | Class   | 0.059 | 0.351  | 0.463      | 0.756        | 0.219        | 0.695        | 0.37         | 0.861        | 0.347        | 0.1089   | 0.002     | 0.001         | 0.004           | 0.015           | 0.003           | 0.004           | 0.004           | 0.022           |
| Jaccard            | 02_OTU_99 | Order   | 0.144 | 0.369  | 0.5        | 0.907        | 0.295        | 0.521        | 0.55         | 0.708        | 0.295        | 0.03     | 0.001     | 0.001         | 0.004           | 0.009           | 0.006           | 0.002           | 0.006           | 0.047           |
| Jaccard            | 02_OTU_99 | Family  | 0.233 | 0.404  | 0.644      | 0.868        | 0.552        | 0.572        | 0.777        | 0.799        | 0.543        | 0.012    | 0.001     | 0.001         | 0.004           | 0.003           | 0.004           | 0.004           | 0.001           | 0.013           |
| Jaccard            | 02_OTU_99 | Genus   | 0.234 | 0.358  | 0.7        | 0.843        | 0.661        | 0.611        | 0.809        | 0.796        | 0.65         | 0.008    | 0.001     | 0.001         | 0.005           | 0.004           | 0.011           | 0.003           | 0.003           | 0.005           |
| Jaccard            | 02_OTU_99 | Species | 0.261 | 0.336  | 0.727      | 0.868        | 0.652        | 0.618        | 0.828        | 0.84         | 0.669        | 0.004    | 0.002     | 0.001         | 0.004           | 0.003           | 0.005           | 0.003           | 0.002           | 0.004           |
| Jaccard            | 02_OTU_99 | OTU/ASV | 0.296 | 0.27   | 0.768      | 0.968        | 0.746        | 0.568        | 0.88         | 0.871        | 0.613        | 0.005    | 0.004     | 0.001         | 0.005           | 0.003           | 0.002           | 0.003           | 0.002           | 0.009           |
| Jaccard            | 03_ASV    | Phylum  | 0     | 0.199  | 0.296      | 0.582        | 0.186        | 0.134        | 0.383        | 0.506        | 0.049        | 0.4116   | 0.007     | 0.001         | 0.005           | 0.0539          | 0.085           | 0.005           | 0.005           | 0.313           |
| Jaccard            | 03_ASV    | Class   | 0.047 | 0.287  | 0.391      | 0.711        | 0.167        | 0.53         | 0.348        | 0.77         | 0.204        | 0.1608   | 0.002     | 0.001         | 0.002           | 0.046           | 0.009           | 0.002           | 0.005           | 0.073           |
| Jaccard            | 03_ASV    | Order   | 0.208 | 0.257  | 0.506      | 0.761        | 0.048        | 0.615        | 0.515        | 0.743        | 0.448        | 0.013    | 0.011     | 0.001         | 0.001           | 0.2887          | 0.008           | 0.003           | 0.005           | 0.025           |
| Jaccard            | 03_ASV    | Family  | 0.28  | 0.277  | 0.663      | 0.88         | 0.392        | 0.58         | 0.737        | 0.844        | 0.603        | 0.007    | 0.003     | 0.001         | 0.003           | 0.004           | 0.005           | 0.005           | 0.005           | 0.007           |
| Jaccard            | 03_ASV    | Genus   | 0.293 | 0.24   | 0.735      | 0.911        | 0.555        | 0.603        | 0.763        | 0.88         | 0.683        | 0.005    | 0.009     | 0.001         | 0.002           | 0.005           | 0.008           | 0.002           | 0.004           | 0.007           |
| Jaccard            | 03_ASV    | Species | 0.262 | 0.211  | 0.707      | 0.907        | 0.544        | 0.569        | 0.71         | 0.877        | 0.689        | 0.008    | 0.014     | 0.001         | 0.003           | 0.005           | 0.007           | 0.005           | 0.006           | 0.007           |
| Jaccard            | 03_ASV    | OTU/ASV | 0.188 | 0.246  | 0.708      | 0.928        | 0.662        | 0.533        | 0.707        | 0.866        | 0.593        | 0.015    | 0.009     | 0.001         | 0.004           | 0.003           | 0.004           | 0.005           | 0.002           | 0.007           |
| Bray-Curtis        | 01_OTU_97 | Phylum  | 0.134 | 0.328  | 0.408      | 0.53         | 0.387        | 0.435        | 0.567        | 0.606        | 0.026        | 0.017    | 0.002     | 0.001         | 0.001           | 0.005           | 0.005           | 0.008           | 0.004           | 0.274           |
| Bray-Curtis        | 01_OTU_97 | Class   | 0.147 | 0.124  | 0.494      | 0.887        | 0.372        | 0.156        | 0.565        | 0.665        | 0.25         | 0.0569   | 0.050     | 0.001         | 0.003           | 0.025           | 0.045           | 0.001           | 0.008           | 0.055           |
| Bray-Curtis        | 01_OTU_97 | Order   | 0.13  | 0.156  | 0.536      | 0.863        | 0.432        | 0.235        | 0.537        | 0.661        | 0.339        | 0.0599   | 0.033     | 0.001         | 0.004           | 0.01            | 0.015           | 0.002           | 0.008           | 0.043           |
| Bray-Curtis        | 01_OTU_97 | Family  | 0.106 | 0.14   | 0.57       | 0.852        | 0.632        | 0.23         | 0.504        | 0.674        | 0.448        | 0.0779   | 0.056     | 0.001         | 0.006           | 0.004           | 0.023           | 0.003           | 0.01            | 0.011           |
| Bray-Curtis        | 01_OTU_97 | Genus   | 0.167 | 0.162  | 0.625      | 0.833        | 0.689        | 0.335        | 0.687        | 0.646        | 0.518        | 0.025    | 0.035     | 0.001         | 0.004           | 0.003           | 0.016           | 0.002           | 0.01            | 0.016           |
| Bray-Curtis        | 01_OTU_97 | Species | 0.165 | 0.166  | 0.621      | 0.826        | 0.659        | 0.341        | 0.707        | 0.663        | 0.528        | 0.033    | 0.015     | 0.001         | 0.004           | 0.002           | 0.013           | 0.007           | 0.008           | 0.008           |
| Bray-Curtis        | 01_OTU_97 | OTU/ASV | 0.183 | 0.188  | 0.67       | 1            | 0.696        | 0.287        | 0.811        | 0.798        | 0.483        | 0.023    | 0.022     | 0.001         | 0.004           | 0.003           | 0.019           | 0.003           | 0.003           | 0.017           |
| Bray-Curtis        | 02_OTU_99 | Phylum  | 0.137 | 0.33   | 0.413      | 0.533        | 0.398        | 0.439        | 0.568        | 0.615        | 0.028        | 0.015    | 0.001     | 0.001         | 0.005           | 0.007           | 0.008           | 0.007           | 0.002           | 0.290           |

|             |           |         |       |       |       |       |       |       |       |       |       |        |       |       |       |       |       |       |       |       |
|-------------|-----------|---------|-------|-------|-------|-------|-------|-------|-------|-------|-------|--------|-------|-------|-------|-------|-------|-------|-------|-------|
| Bray-Curtis | 02_OTU_99 | Class   | 0.146 | 0.121 | 0.493 | 0.885 | 0.365 | 0.15  | 0.572 | 0.667 | 0.256 | 0.048  | 0.060 | 0.001 | 0.004 | 0.029 | 0.051 | 0.005 | 0.004 | 0.069 |
| Bray-Curtis | 02_OTU_99 | Order   | 0.128 | 0.154 | 0.534 | 0.867 | 0.426 | 0.23  | 0.541 | 0.667 | 0.332 | 0.0669 | 0.037 | 0.001 | 0.004 | 0.009 | 0.025 | 0.003 | 0.005 | 0.055 |
| Bray-Curtis | 02_OTU_99 | Family  | 0.104 | 0.136 | 0.564 | 0.852 | 0.617 | 0.215 | 0.5   | 0.683 | 0.437 | 0.0769 | 0.062 | 0.001 | 0.004 | 0.006 | 0.029 | 0.002 | 0.008 | 0.015 |
| Bray-Curtis | 02_OTU_99 | Genus   | 0.119 | 0.131 | 0.567 | 0.83  | 0.604 | 0.332 | 0.48  | 0.682 | 0.433 | 0.0559 | 0.056 | 0.001 | 0.004 | 0.005 | 0.026 | 0.002 | 0.006 | 0.014 |
| Bray-Curtis | 02_OTU_99 | Species | 0.181 | 0.167 | 0.652 | 0.985 | 0.613 | 0.318 | 0.724 | 0.772 | 0.482 | 0.026  | 0.025 | 0.001 | 0.004 | 0.002 | 0.017 | 0.003 | 0.002 | 0.018 |
| Bray-Curtis | 02_OTU_99 | OTU/ASV | 0.17  | 0.188 | 0.659 | 1     | 0.663 | 0.254 | 0.818 | 0.802 | 0.448 | 0.022  | 0.026 | 0.001 | 0.005 | 0.002 | 0.027 | 0.003 | 0.002 | 0.009 |
| Bray-Curtis | 03_ASV    | Phylum  | 0.151 | 0.304 | 0.406 | 0.554 | 0.272 | 0.413 | 0.591 | 0.635 | 0.065 | 0.014  | 0.001 | 0.001 | 0.003 | 0.031 | 0.01  | 0.002 | 0.006 | 0.195 |
| Bray-Curtis | 03_ASV    | Class   | 0.15  | 0.112 | 0.489 | 0.915 | 0.328 | 0.128 | 0.602 | 0.682 | 0.267 | 0.04   | 0.061 | 0.001 | 0.001 | 0.038 | 0.071 | 0.004 | 0.008 | 0.071 |
| Bray-Curtis | 03_ASV    | Order   | 0.136 | 0.146 | 0.536 | 0.876 | 0.409 | 0.189 | 0.578 | 0.689 | 0.346 | 0.0539 | 0.044 | 0.001 | 0.002 | 0.017 | 0.035 | 0.001 | 0.003 | 0.056 |
| Bray-Curtis | 03_ASV    | Family  | 0.111 | 0.131 | 0.577 | 0.863 | 0.63  | 0.18  | 0.53  | 0.733 | 0.454 | 0.0709 | 0.058 | 0.001 | 0.002 | 0.003 | 0.025 | 0.003 | 0.005 | 0.017 |
| Bray-Curtis | 03_ASV    | Genus   | 0.128 | 0.126 | 0.576 | 0.843 | 0.593 | 0.294 | 0.517 | 0.722 | 0.441 | 0.0539 | 0.041 | 0.001 | 0.003 | 0.003 | 0.019 | 0.005 | 0.005 | 0.017 |
| Bray-Curtis | 03_ASV    | Species | 0.188 | 0.159 | 0.656 | 0.994 | 0.607 | 0.268 | 0.746 | 0.806 | 0.485 | 0.028  | 0.03  | 0.001 | 0.004 | 0.001 | 0.023 | 0.005 | 0.006 | 0.01  |
| Bray-Curtis | 03_ASV    | OTU/ASV | 0.184 | 0.191 | 0.665 | 1     | 0.668 | 0.244 | 0.846 | 0.809 | 0.474 | 0.015  | 0.02  | 0.001 | 0.002 | 0.006 | 0.025 | 0.004 | 0.007 | 0.018 |
